# Supplementary material for: Decision aids for shared decision-making and appropriate anticoagulation therapy in patients with atrial fibrillation: a systematic review and meta-analysis
Source: Oxford University Press journal article supplement (doi:10.1093/eurjcn/zvab085), 2021-09-08
Supplement: zvab085_supplementary_data.docx [file zvab085_supplementary_data.docx]

Appendix I-Search Strategy for MEDLINE

| # | Searches | Results |
| --- | --- | --- |
| 1 | Atrial fibrillation | 132516 |
| 2 | Shared decision making | 35290 |
| 3 | Decision making | 146020 |
| 4 | Decision aid | 54651 |
| 5 | Decision support | 461842 |
| 6 | Decision tool | 165742 |
| 7 | 2 or 3 or 4 or 5 or 6 | 165742 |
| 8 | 1 and 7 | 393 |
